# Supplementary material
Source: PubMed Central journal article supplement (PMC2836805)
Supplement: NIHMS172824-supplement-Supp1.pdf [file NIHMS172824-supplement-Supp1.pdf]

## SUPPLEMENTAL MATERIAL

Chang et al  
Supplemental Data  
Figure 1S

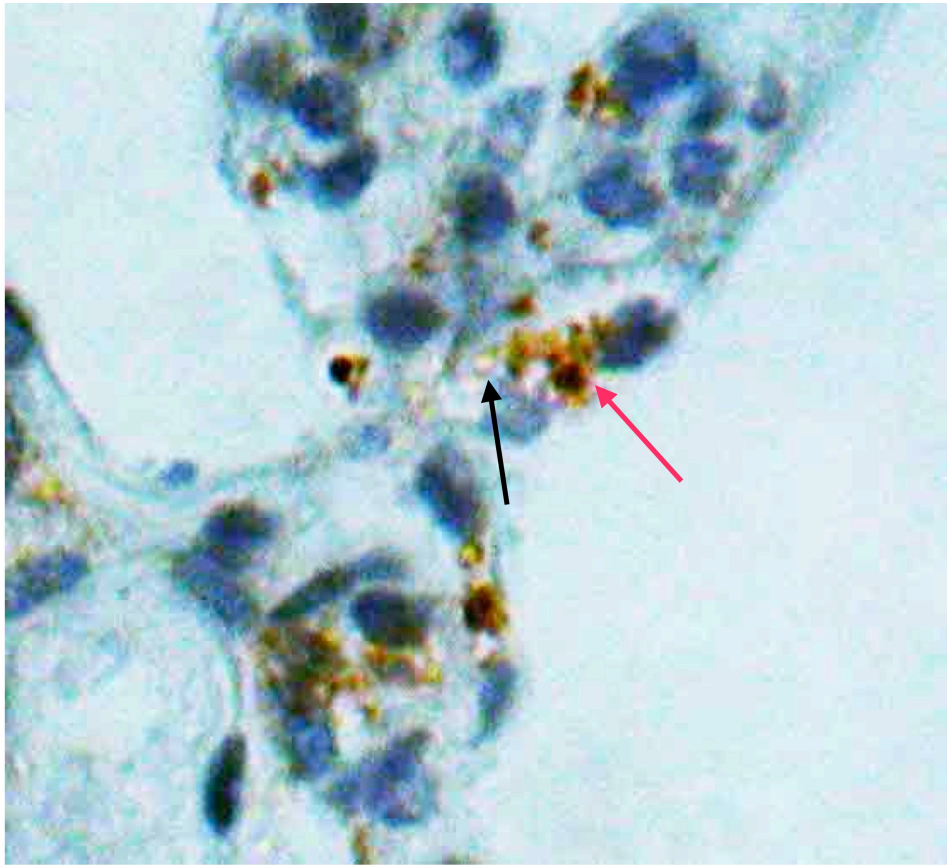

Microscopy through a partially closed condenser diaphragm showed the PGT-positive cells (brown reaction product, red arrow) to have the birefringent lamellar bodies (black arrow) characteristic of type II alveolar epithelial cells<sup>20</sup>.

Chang et al  
Supplemental Data Figure 2S  
COX-1 and COX-2 immunohistochemistry in rescued adult PGT<sup>-/-</sup> mice

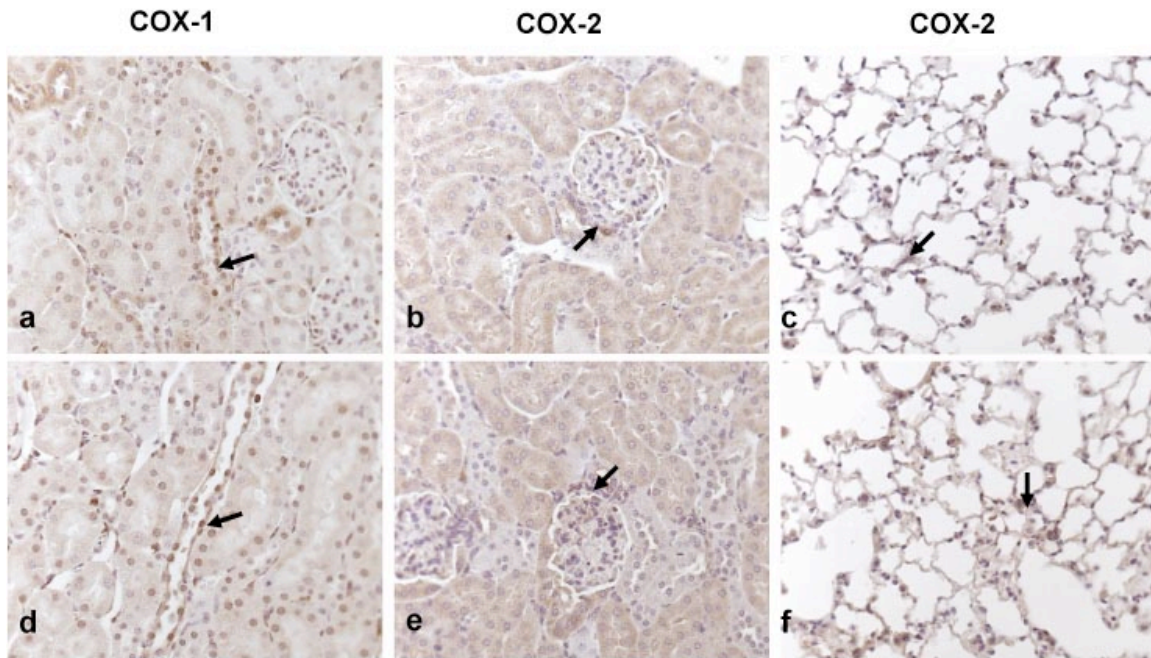

a,b,c: PGT<sup>+/+</sup> kidney (a, b) and lung (c);  
d,e,f: PGT<sup>-/-</sup> (d, e) and lung (f).

COX-1 was expressed in cortical collecting duct (a,d, arrows); COX-2 was expressed in macula densa (b, e arrow) and macrophages in lungs (c, f arrows).

There was no significant difference in COX-1 or COX-2 staining intensity between PGT<sup>-/-</sup> and <sup>+/+</sup> mice.

Lungs and kidneys of 5-7 month old PGT<sup>-/-</sup> (n = 4) and PGT<sup>+/+</sup> (n = 5) mice were examined. Paraffin sections were subjected to immunohistochemical analysis using standard methods as above. Sections were incubated overnight at 4°C with polyclonal rabbit anti-mouse COX-1 (1:200 dilution; Cat.# 160109; Cayman Chemical, Ann Arbor, MI) and anti-mouse COX-2 antisera (1:200 for kidney, 1:400 for lung; Cat.# 160126; Cayman Chemical). Sections were then incubated with biotin-conjugated goat anti-rabbit IgG for 1 hour at room temperature. Visualization was by DAB as described above.

**Chang et al**  
**SUPPLEMENTAL MATERIAL**

**Table 1S. Primer Pairs Used for PCR to Detect of all Phenotypes**

| Primer Site             | Primers                          | Amplimer<br>Size (kb)* |
|-------------------------|----------------------------------|------------------------|
| Outside of Neo gene (1) | 5'-GTTCTTCGGACGCCTCGTCAACAC-3'   | 2.5                    |
|                         | 5'-ACTCATCTATGACCATAACCACCCTG-3' |                        |
| Inside of Neo gene (2)  | 5'-AGGTGAGATGACAGGAGATC-3'       | 1.1                    |
|                         | 5'-TGCCTGTGCTCTGACTTGCATCTC-3'   |                        |
| Wild type AA' (3)       | 5'-TGTCAGTTCTCTCCCTCACATCG-3'    | 2.8                    |
|                         | 5'-TGGCTAAACTCCTCTGCATCCC-3'     |                        |
| Wild type BB' (4)       | 5'-ATACGCGGTCTCCTCTTCCT-3'       | 1.0                    |
|                         | 5'-CAAGGTGCTGGCTAAACTCC-3'       |                        |
| Third LoxP (5)          | 5'-CAAGCAGGAGGACCTGAGTT-3'       | 0.18                   |
|                         | 5'-CCCCACGTGTTTCTCAGATG-3'       | 0.21                   |

\*kb: kilo basepair

Chang et al  
 Supplemental Data  
 Table 2S.

Real-time PCR on mouse embryos and on lung, hear, and kidney of adult rescued PGT -/- mice (n = 5) compared to adult PGT +/+ mice (n = 6).

P values were obtained by t-test.

Bold values for P are statistically significant.

Mouse embryo

| Gene    | mPGT         | Cox1  | Cox2  | EP2   | EP4   |
|---------|--------------|-------|-------|-------|-------|
| PGT -/- | 0.115        | 0.976 | 0.897 | 0.959 | 0.716 |
| SEM     | 0.017        | 0.118 | 0.119 | 0.123 | 0.083 |
| PGT +/+ | 1.206        | 1.048 | 1.067 | 0.953 | 0.933 |
| SEM     | 0.104        | 0.032 | 0.047 | 0.052 | 0.100 |
| P=      | <b>0.008</b> | 0.650 | 0.366 | 0.970 | 0.196 |

Mouse lung

| Gene    | mPGT         | Cox1         | Cox2  | EP2   | EP4   |
|---------|--------------|--------------|-------|-------|-------|
| PGT -/- | 0.010        | 0.556        | 0.237 | 0.500 | 0.349 |
| SEM     | 0.002        | 0.105        | 0.053 | 0.121 | 0.067 |
| PGT +/+ | 1.442        | 1.125        | 0.575 | 0.893 | 0.605 |
| SEM     | 0.366        | 0.181        | 0.143 | 0.151 | 0.136 |
| P=      | <b>0.030</b> | <b>0.043</b> | 0.095 | 0.091 | 0.161 |

Mouse heart

| Gene    | mPGT         | Cox1  | Cox2  | EP2          | EP4   |
|---------|--------------|-------|-------|--------------|-------|
| PGT -/- | 0.138        | 0.884 | 1.214 | 1.889        | 1.362 |
| SEM     | 0.032        | 0.107 | 0.340 | 0.208        | 0.208 |
| PGT +/+ | 0.678        | 0.734 | 0.721 | 1.035        | 0.771 |
| SEM     | 0.116        | 0.091 | 0.174 | 0.118        | 0.161 |
| P=      | <b>0.014</b> | 0.186 | 0.211 | <b>0.012</b> | 0.053 |

Mouse kidney

| Gene    | mPGT         | Cox1  | Cox2  | EP2   | EP4          |
|---------|--------------|-------|-------|-------|--------------|
| PGT -/- | 0.155        | 1.595 | 1.684 | 2.203 | 3.289        |
| SEM     | 0.032        | 0.164 | 0.174 | 0.182 | 0.249        |
| PGT +/+ | 1.128        | 1.249 | 2.030 | 1.787 | 1.617        |
| SEM     | 0.233        | 0.159 | 0.397 | 0.346 | 0.154        |
| P=      | <b>0.024</b> | 0.267 | 0.271 | 0.560 | <b>0.002</b> |
